# Supplementary material
Source: publisher site journal article supplement (https://www.dovepress.com/article/564685)
Supplement: Supplementary file 1 [file 564685%20Supplementary%20Material.docx]

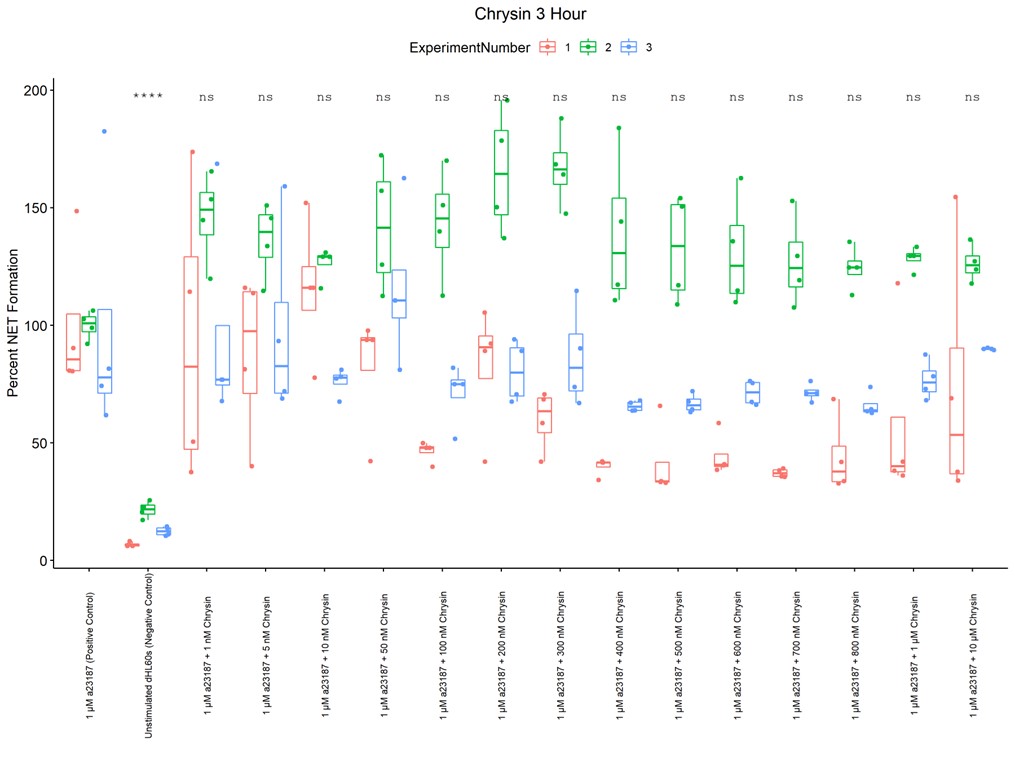


Supplementary Figure 1: Experiment-to-experiment variability potentially indicating an effect from the time of storage of chrysin in aqueous solution
